# Supplementary material for: Enhanced stability and photovoltage for inverted perovskite solar cells via precursor engineering
Source: Royal Society of Chemistry journal article supplement (doi:10.1039/c9ta03454d), 2019-01-01
Supplement: c9ta03454d1.pdf [file c9ta03454d1.pdf]

## Supporting Information

### Enhanced Stability and Photovoltage for Inverted Perovskite Solar Cells via Precursor Engineering

Changwen Liu<sup>1</sup>, Weiguang Kong<sup>1</sup>, Wang Li<sup>1</sup>, Hong Chen<sup>1</sup>, Dedi Li<sup>1</sup>, Weijun Wang<sup>1</sup>, Baomin Xu<sup>1</sup>,  
Chun Cheng<sup>1,\*</sup>, Alex K. Y. Jen<sup>2</sup>

<sup>1</sup>Department of Materials Science and Engineering, Southern University of Science and Technology (SUSTech), Shenzhen, 518055, China

<sup>2</sup>Department of Materials Science and Engineering, City University of Hong Kong (CityU), Kowloon 999077, Hong Kong SAR

E-mail: chengc@sustech.edu.cn

#### Experimental Section

Patterned ITO glass with a sheet resistance of  $15 \Omega \text{ sq}^{-1}$  was purchased from Ying Kou You Xuan Trade Co. Ltd.  $\text{PbI}_2$  (99.9985%) was obtained from Alfa Aesar. TAPC (97%), CsI, PTAA (Mn=3200, Mw=4900), MAI, MABr, FAI,  $\text{PbBr}_2$  (99%),  $\text{PbCl}_2$  (99%),  $\text{C}_{60}$  (99%), and BCP (>99%) were purchased from Xi'an Polymer Light Technology Corp. DMF (99.8%), DMSO ( $\geq 99.9\%$ ), and chlorobenzene (99.8%) were purchased from Sigma Aldrich.

*Perovskite precursor preparation:*  $\text{FAPbI}_3$  (A) precursor was prepared by mixing 1M FAI and 1.05M  $\text{PbI}_2$  in 1 mL DMF/DMSO (v/v, 4:1).  $\text{MAPbBr}_3$  (B) precursor was prepared by mixing 1M MABr and 1M  $\text{PbBr}_2$  in 1 mL DMF/DMSO (v/v, 4:1).  $\text{MAPbI}_{3-x}\text{Cl}_x$  (C) precursor was prepared by mixing 1.2M MAI, 1.1M  $\text{PbI}_2$ , and 0.12M  $\text{PbCl}_2$  in 1 mL DMF/DMSO (v/v, 4:1). Then 0.83 mL A and 0.17 mL B was mixed to form the control precursor  $\text{A}_{0.83}\text{B}_{0.17}$ . For the alloyed perovskite precursors, certain amount of C (0  $\mu\text{L}$ , 93  $\mu\text{L}$ , 147  $\mu\text{L}$ , or 208  $\mu\text{L}$ ) was added to the control precursor to form the alloyed precursor  $(\text{A}_{0.83}\text{B}_{0.17})_{1-y}\text{C}_y$  with  $y = 0, 0.1, 0.15, \text{ or } 0.2$ , respectively. For the  $\text{Cs}_{0.05}(\text{A}_{0.83}\text{B}_{0.17})_{0.95}$  precursor, 1M FAI, 1.05M  $\text{PbI}_2$ , 0.2M MABr, and 0.2M  $\text{PbBr}_2$  were dissolved in 1 mL DMF/DMSO (v/v, 4:1), then 5% vol CsI (1.5M stock solution in DMSO) was added to the mixed precursor as described elsewhere.<sup>1</sup>

*Device fabrication:* Patterned ITO-coated glass substrates were cleaned ultrasonically with detergent, deionized water, acetone, and isopropanol in sequence for 20min each. After UV-ozone cleaning for 30min, ITO glass was moved into  $\text{N}_2$ -purged glovebox. TAPC+PTAA HTL were deposited on the ITO substrate, as reported previously.<sup>2</sup> The alloyed precursor  $(\text{A}_{0.83}\text{B}_{0.17})_{1-y}\text{C}_y$  was spin coated onto the TAPC-coated ITO substrates at 1000 rpm for 10s and 5000 rpm for 30s, and

100  $\mu\text{L}$  of chlorobenzene were rapidly dropped on the substrates after 15 s of the spin coating. Then the samples were annealed at 100  $^{\circ}\text{C}$  for 1h. Finally,  $\text{C}_{60}$  (30 nm), BCP (8 nm), and Ag (100 nm) were sequentially deposited onto the perovskite layer by thermal evaporation through a shadow mask with an active area of 0.10  $\text{cm}^2$ .

*Characterization:* The morphologies of perovskite and HTLs films were characterized by scanning electron microscopy (SEM, TESCAN MIRA3) at a 5kV accelerating voltage. Atomic force microscope (AFM) images of HTLs films were collected on a multimode SPM (Bruker) with tapping mode. UPS analysis was conducted to measure the energy level of HTLs with an unfiltered He I (21.22 eV) gas discharge lamp and a hemispherical analyzer. Steady-state and time-resolved PL spectra were measured using an Edinburgh FLS920 spectroscopy system, using pulsed laser excitation at 405 nm. The time-resolved PL measurements were carried out by a Deltaflex TCSPC system (Horiba) at 950 nm with a 479 nm laser. Electrochemical impedance spectroscopy (EIS) measurements were performed on an electrochemical workstation (Zahner). Photocurrent density-voltage ( $J$ - $V$ ) curves were measured under AM 1.5 G one sun illumination (100  $\text{mW}/\text{cm}^2$ ) with a solar simulator (Enlitech SS-F7-3A) equipped with a 300 W Xenon lamp and a Keithley 2400 source meter. The light intensity was adjusted by an NREL-calibrated Si solar cell. During measurement, the cell was covered by a mask with an aperture of 0.1  $\text{cm}^2$ .

**Table S1.** Typical method of precursor engineering toward increased  $V_{\text{oc}}$ .

| Year | Method                                | Perovskite                      | Device type | $V_{\text{oc}}$ increment | Ref. |
|------|---------------------------------------|---------------------------------|-------------|---------------------------|------|
| 2014 | MAI doping                            | $\text{FAPbI}_3$                | Regular     | From 0.93V to 1.03V       | 3    |
| 2015 | MACl doping                           | $\text{MAPbI}_3$                | Regular     | From 0.93V to 1.08V       | 4    |
| 2016 | $\text{Pb}(\text{SCN})_2$ doping      | $\text{MAPbI}_3$                | Regular     | From 1.09V to 1.11V       | 5    |
| 2017 | $\text{Cu}(\text{Tu})\text{I}$ doping | $\text{MAPbI}_{3-x}\text{Cl}_x$ | Inverted    | From 1.00V to 1.11V       | 6    |
| 2018 | F4TCNQ doping                         | $\text{MAPbI}_{3-x}\text{Cl}_x$ | Inverted    | From 1.00V to 1.10V       | 7    |
| 2019 | Solvent replacement for DMF           | $\text{MAPbI}_3$                | Inverted    | From 1.00V to 1.06V       | 8    |

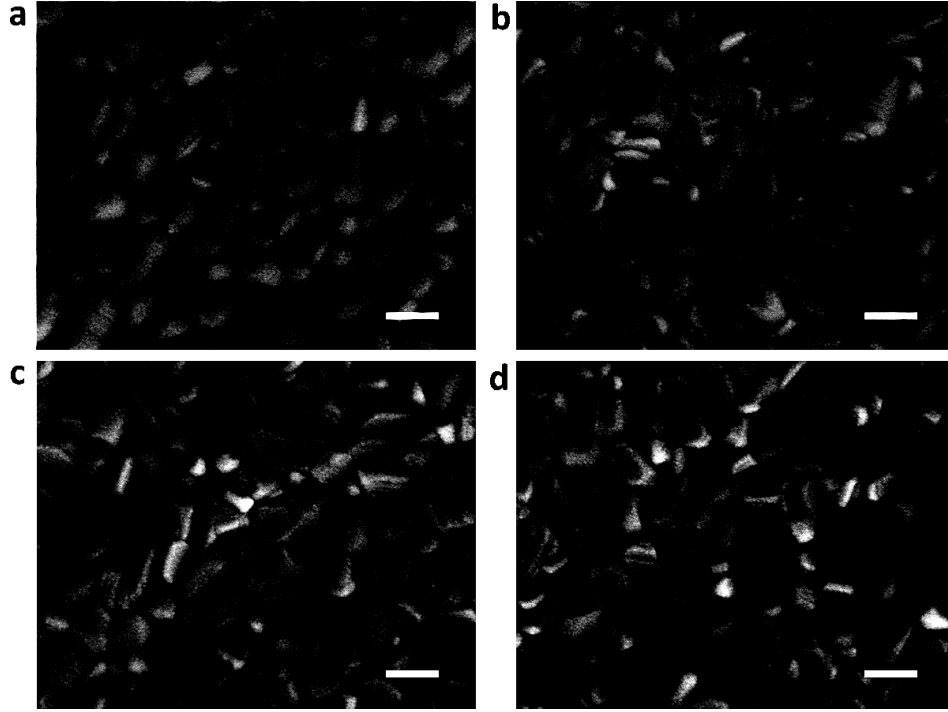

**Figure S1.** High contrast SEM images of Figure 1. (a)  $y = 0$ , (b)  $y = 0.1$ , (c)  $y = 0.15$ , and (d)  $y = 0.2$ . Scale bar, 300 nm.

**Table S2.** Fitting parameters from TRPL spectra.<sup>a)</sup>

|            | $A_1$ | $\tau_1$ (ns) | $A_2$ | $\tau_2$ (ns) | $\tau_{average}$ (ns) |
|------------|-------|---------------|-------|---------------|-----------------------|
| $y = 0$    | 640   | 4.5           | 1340  | 206           | 203.9                 |
| $y = 0.1$  | 800   | 7.0           | 2260  | 210           | 207.6                 |
| $y = 0.15$ | 620   | 7.5           | 1750  | 238           | 235.5                 |
| $y = 0.2$  | 1300  | 4.3           | 2630  | 190           | 187.9                 |

<sup>a)</sup>The TRPL spectra were fitted by a bi-exponential decay function,

$$I(t) = A_1 e^{-t/\tau_1} + A_2 e^{-t/\tau_2}$$

and the average PL lifetime is calculated by

$$\tau_{average} = \frac{A_1 \tau_1^2 + A_2 \tau_2^2}{A_1 \tau_1 + A_2 \tau_2}$$

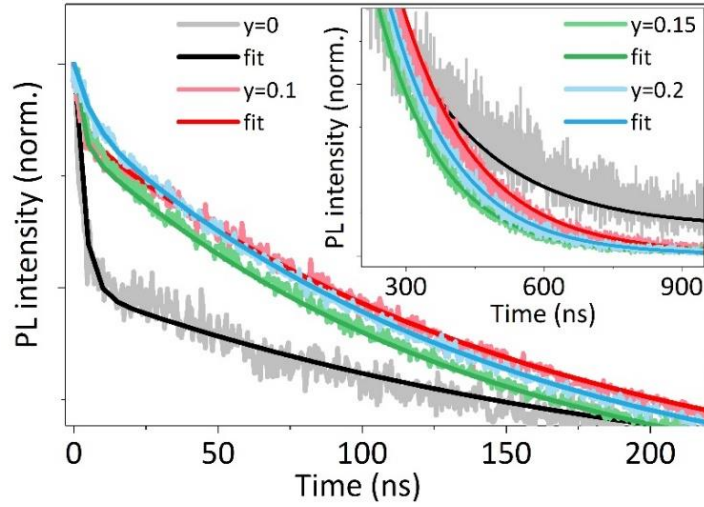

**Figure S2.** TRPL spectra of perovskite/HTL samples. Inset is the magnification of the region with longer decay time. The decay lifetime is 196.7 ns, 164.5 ns, 137.5 ns, and 146.2 ns for  $y = 0, 0.1, 0.15,$  and  $0.2,$  respectively.

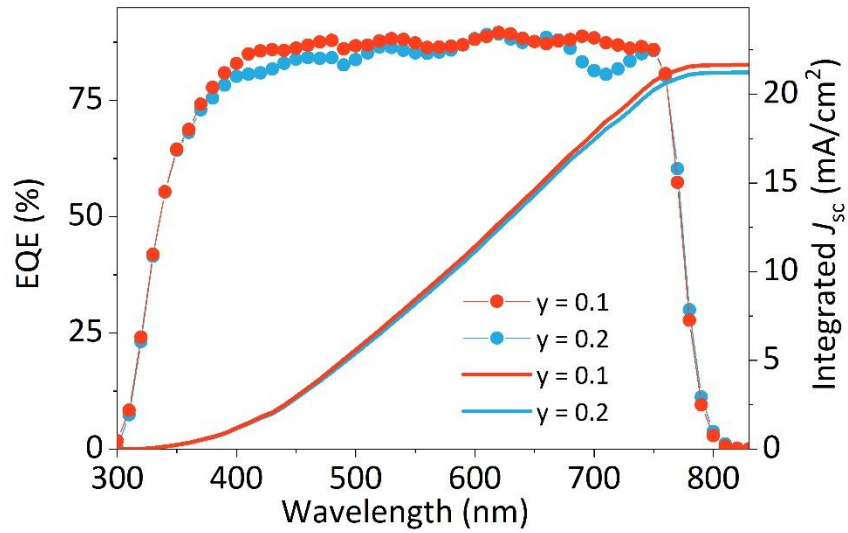

**Figure S3.** EQE spectra of devices with  $y = 0.1$  and  $y = 0.2,$  of which the integrated  $J_{sc}$  is 21.7  $\text{mA}/\text{cm}^2$  and 21.3  $\text{mA}/\text{cm}^2,$  respectively.

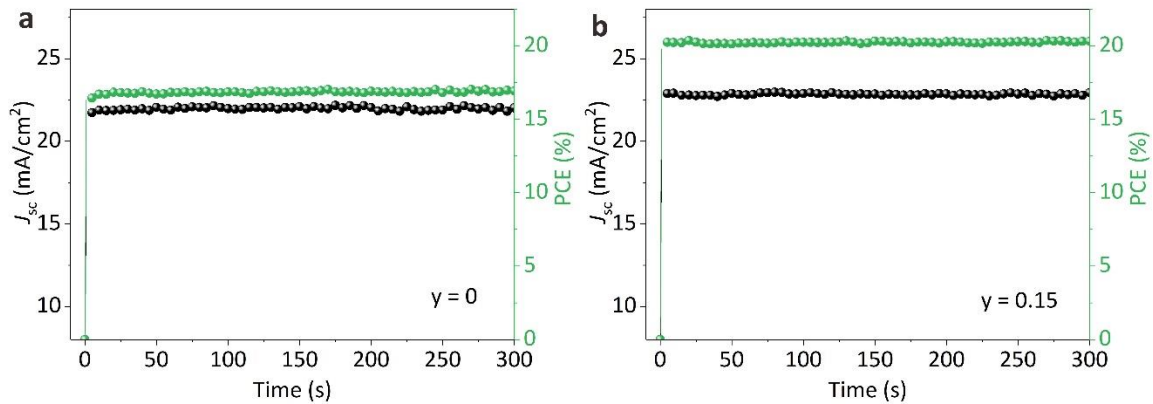

**Figure S4.** Steady state  $J_{sc}$  and PCE up on light exposure for (a) control device,  $y = 0$  and (b) optimized device,  $y = 0.15$ .

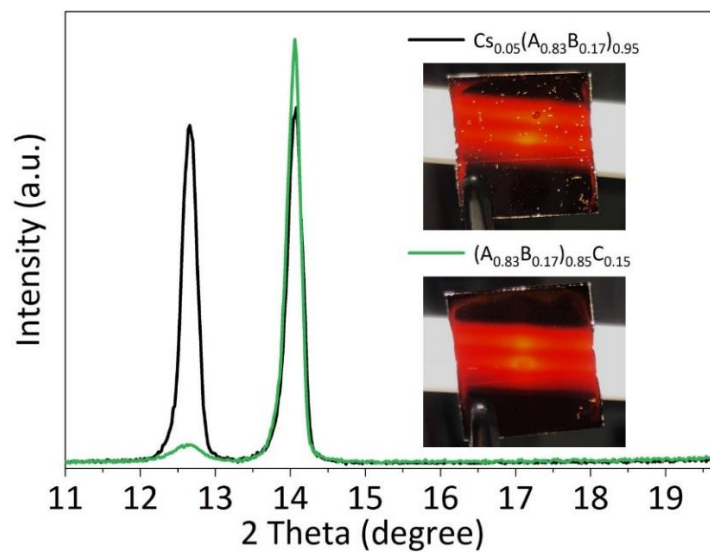

**Figure S5.** XRD of perovskite films,  $\text{Cs}_{0.05}(\text{A}_{0.83}\text{B}_{0.17})_{0.95}$  and  $(\text{A}_{0.83}\text{B}_{0.17})_{0.85}\text{C}_{0.15}$ , after stored in ambient air under 70% RH for 300h in dark. Insets show the appearance of corresponding films.

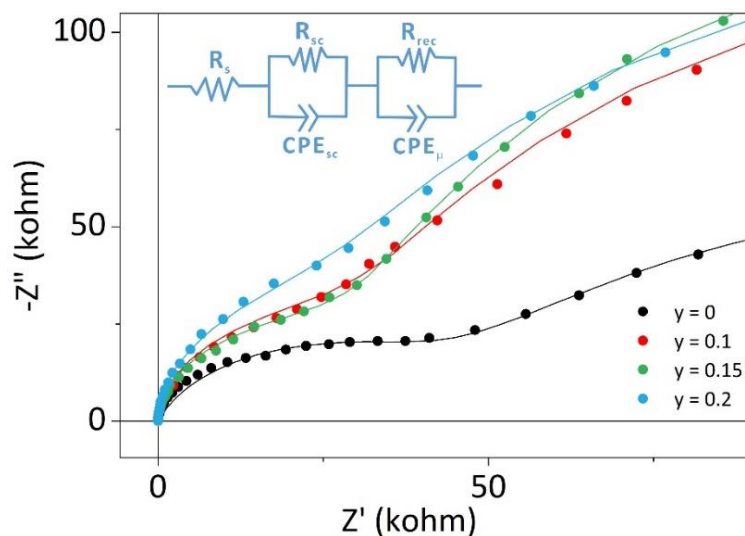

**Figure S6.** EIS spectra of devices based on control and alloyed perovskites. Inset shows the equivalent circuit.

#### Reference

1. M. Saliba, T. Matsui, J.-Y. Seo, K. Domanski, J.-P. Correa-Baena, M. K. Nazeeruddin, S. M. Zakeeruddin, W. Tress, A. Abate, A. Hagfeldt and M. Grätzel, *Energy Environ. Sci.*, 2016, **9**, 1989-1997.
2. W. Li, C. Liu, Y. Li, W. Kong, X. Wang, H. Chen, B. Xu and C. Cheng, *Sol. RRL*, 2018, **2**, 1800173.
3. N. Pellet, P. Gao, G. Gregori, T.-Y. Yang, M. K. Nazeeruddin, J. Maier and M. Graetzel, *Angew. Chem. Int. Edit.*, 2014, **53**, 3151-3157.
4. K. Yan, M. Long, T. Zhang, Z. Wei, H. Chen, S. Yang and J. Xu, *J. Am. Chem. Soc.*, 2015, **137**, 4460-4468.
5. W. Ke, C. Xiao, C. Wang, B. Saparov, H.-S. Duan, D. Zhao, Z. Xiao, P. Schulz, S. P. Harvey, W. Liao, W. Meng, Y. Yu, A. J. Cimaroli, C.-S. Jiang, K. Zhu, M. Al-Jassim, G. Fang, D. B. Mitzi and Y. Yan, *Adv. Mater.*, 2016, **28**, 5214-5221.
6. S. Ye, H. Rao, Z. Zhao, L. Zhang, H. Bao, W. Sun, Y. Li, F. Gu, J. Wang, Z. Liu, Z. Bian and C. Huang, *J. Am. Chem. Soc.*, 2017, **139**, 7504-7512.
7. W.-Q. Wu, Q. Wang, Y. Fang, Y. Shao, S. Tang, Y. Deng, H. Lu, Y. Liu, T. Li, Z. Yang, A. Gruverman and J. Huang, *Nat. Commun.*, 2018, **9**, 1625.
8. L. Chao, Y. Xia, B. Li, G. Xing, Y. Chen and W. Huang, *Chem*, 2019, **5**, 995-1006.
